# Supplementary material
Source: publisher figshare collection journal article supplement (https://gsajournals.figshare.com/articles/dataset/_/9959492)
Supplement: Supplementary file 1 [file 1]

| Region | CHR | position  | $\log_{10}$ pval - | $\log_{10}$ pval + | Significant line |
|--------|-----|-----------|--------------------|--------------------|------------------|
| 1:a    | 1   | 7422723   | 5.21077455         | 4.6074471          | both             |
| 1:b    | 1   | 20580348  | 5.47044894         | 3.5682896          | pHu-             |
| 1:b    | 1   | 23041817  | 1.75932274         | 5.0142726          | pHu+             |
| 1:b    | 1   | 23252056  | 2.45288017         | 4.5683206          | pHu+             |
| 1:b    | 1   | 23272229  | 2.83719381         | 5.9396324          | pHu+             |
| 1:b    | 1   | 23320089  | 1.68565070         | 4.6247660          | pHu+             |
| 1:b    | 1   | 24859232  | 4.60007599         | 4.3567040          | pHu+             |
| 1:b    | 1   | 25657556  | 2.35853939         | 4.5047457          | pHu+             |
| 1:b    | 1   | 25685185  | 3.44890614         | 5.0023590          | pHu+             |
| 1:b    | 1   | 25810165  | 2.48970129         | 5.2272238          | pHu+             |
| 1:b    | 1   | 26057879  | 3.56103427         | 6.4782438          | pHu+             |
| 1:b    | 1   | 26172004  | 2.18477907         | 5.3908145          | pHu+             |
| 1:b    | 1   | 26417615  | 2.96563878         | 4.5251675          | pHu+             |
| 1:b    | 1   | 26484802  | 4.44639584         | 5.4721635          | pHu+             |
| 1:b    | 1   | 26535744  | 2.56158176         | 4.9235733          | pHu+             |
| 1:b    | 1   | 26549337  | 4.44639584         | 5.4721635          | pHu+             |
| 1:b    | 1   | 26585179  | 4.44639584         | 5.4721635          | pHu+             |
| 1:b    | 1   | 26664752  | 3.94536868         | 6.4587606          | pHu+             |
| 1:b    | 1   | 26719501  | 2.92295423         | 4.3987421          | pHu+             |
| 1:b    | 1   | 26895425  | 5.36602115         | 4.1493245          | pHu-             |
| 1:b    | 1   | 26915492  | 5.53265616         | 3.3652977          | pHu-             |
| 1:b    | 1   | 27053505  | 4.95463188         | 1.2118964          | pHu-             |
| 2:a    | 2   | 24035796  | 0.05527689         | 4.5356497          | pHu+             |
| 2:a    | 2   | 28483504  | 5.33780455         | 0.7743481          | pHu-             |
| 2:a    | 2   | 28502208  | 5.14240939         | 0.7091620          | pHu-             |
| 2:a    | 2   | 31975586  | 5.65490823         | 0.5064980          | pHu-             |
| 3:a    | 3   | 16910143  | 0.51844889         | 5.1225303          | pHu+             |
| 3:a    | 3   | 17256775  | 0.34720312         | 4.9183282          | pHu+             |
| 3:a    | 3   | 18221565  | 0.46198157         | 4.3883626          | pHu+             |
| 3:a    | 3   | 18348456  | 0.07279455         | 5.2099823          | pHu+             |
| 3:a    | 3   | 18598504  | 0.15273550         | 5.5729773          | pHu+             |
| 3:b    | 3   | 104194096 | 0.66134818         | 5.3095180          | pHu+             |
| 4:a    | 4   | 63446574  | 5.64460484         | 0.9894550          | pHu-             |
| 6:a    | 6   | 6356771   | 0.44110600         | 4.7090271          | pHu+             |
| 13:a   | 13  | 14544320  | 1.23371366         | 5.4294493          | pHu+             |
| 14:a   | 14  | 1718020   | 0.21743406         | 4.7147736          | pHu+             |
| 17:a   | 17  | 8225007   | 0.16401880         | 4.5066901          | pHu+             |
| 21:a   | 21  | 4259090   | 0.32265976         | 4.5090274          | pHu+             |
| 22:a   | 22  | 4635167   | 0.83432065         | 5.3513924          | pHu+             |

Table S1: All Significant SNPs found with HMM approach in the chicken data. CHR column indicates the chromosome where the significant SNP is found, position indicates at which position in this chromosome,  $\log_{10}$  pval - is the pvalue found at this locus in the pHu- line,  $\log_{10}$  pval + is the pvalue found at this locus in the pHu+ line and the column Significant line indicates the line for which this locus is significant
